# Supplementary material for: The transcription factors Ik-1 and MZF1 downregulate IGF-IR expression in NPM-ALK+ T-cell lymphoma
Source: Springer Nature journal article supplement (doi:10.1186/s12943-015-0324-2), 2015-02-24
Supplement: MOESM1 [file 9762998]

**SUPPORTING RESULTS**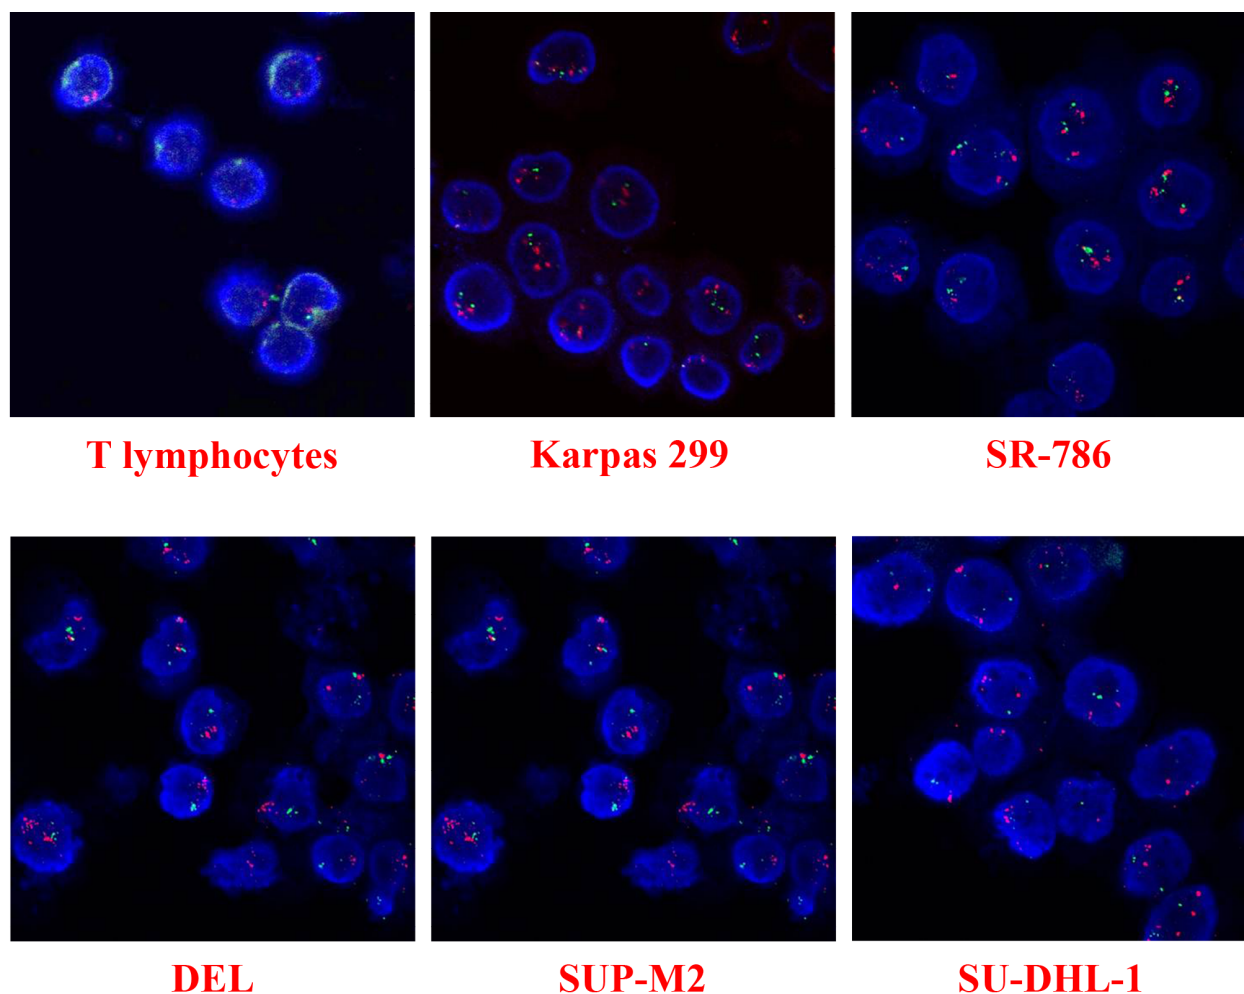

**Figure 1-AF. FISH analysis of *IGF-IR* gene (red signal) and chromosome enumeration 15 (green signal; CEP15), which detects centromere 15, copy numbers in normal human T lymphocytes and NPM-ALK<sup>+</sup> T-cell lymphoma cell lines.**

FISH studies show no evidence to support amplification of *IGF-IR* gene in NPM-ALK<sup>+</sup> T-cell lymphoma cells. As shown in Table 1-AF, the *IGF-IR*-to-CEP15 ratio was consistently < 2.0 in the T lymphocytes as well as in the NPM-ALK<sup>+</sup> T-cell lymphoma cells.

**Table 1-AF. The average number of *IGF-IR* and CEP15 copies per cell as detected by FISH analysis.**

|                      | <i>IGF-IR</i> | CEP15 | <i>IGF-IR-to-CEP15 ratio</i> |
|----------------------|---------------|-------|------------------------------|
| <b>T lymphocytes</b> | 1.51          | 1.53  | 0.99                         |
| <b>Karpas 299</b>    | 3.02          | 2.56  | 1.18                         |
| <b>SR-786</b>        | 4.18          | 3.89  | 1.07                         |
| <b>DEL</b>           | 4.44          | 4.44  | 1.00                         |
| <b>SUP-M2</b>        | 2.54          | 1.94  | 1.31                         |
| <b>SU-DHL-1</b>      | 2.65          | 2.13  | 1.24                         |
